# Supplementary material
Source: Springer Nature journal article supplement (https://www.springermedizin.de/resource/supplementary/13023_2012_550_MOESM6_ESM.pdf/9642756)
Supplement: MOESM6 [file 9642756]

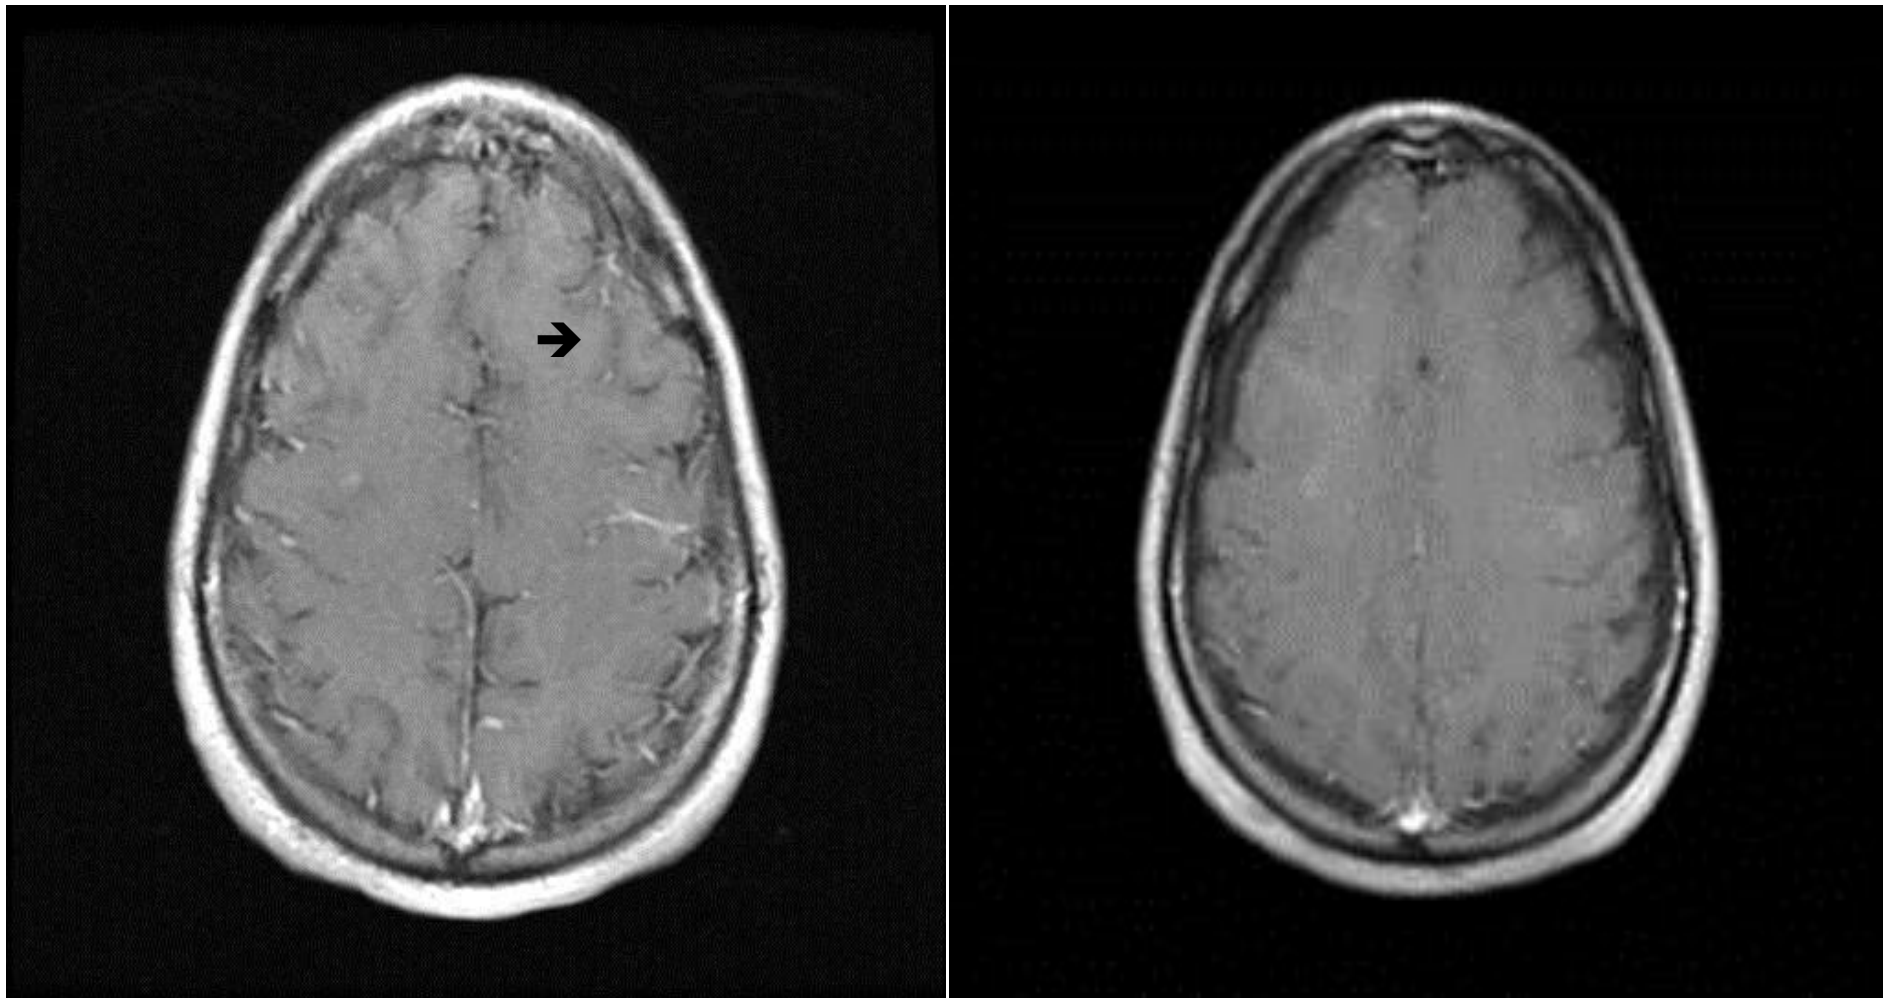

(Image Six)

Patient Two – A: MRI imaging shows the T1 post-contrast image demonstrating the cord lesion in the left frontal lobe in 12/2010. B: On repeat imaging in 07/2011, the enhancement mostly resolved.
